# Supplementary material for: Investigating the Antituberculosis Activity of Selected Commercial Essential Oils and Identification of Active Constituents Using a Biochemometrics Approach and In Silico Modeling
Source: MDPI journal article supplement (doi:10.3390/antibiotics11070948), 2022-07-14
Supplement: s1 [file s1]

## Supplementary Material

**Table S1.** This is a table of the 85 essential oils studied, the major chemical compounds identified by GC-MS-FID, and the mean MIC values.

| Scientific name                                       | Major compounds (% area)                                                                                                                                  | MIC values (mg/mL)  |                     |                  | MIC values (µg/mL)     |
|-------------------------------------------------------|-----------------------------------------------------------------------------------------------------------------------------------------------------------|---------------------|---------------------|------------------|------------------------|
|                                                       |                                                                                                                                                           | <i>M. smegmatis</i> | <i>M. fortuitum</i> | <i>M. goodii</i> | <i>M. tuberculosis</i> |
| <i>Abies alba</i> Mill.                               | <b>α-Pinene</b> (34.0), <b>limonene</b> (20.3), <b>β-pinene</b> (17.9), <b>camphene</b> (13.1), β-caryophyllene (5.8)                                     | 2.0                 | 2.0                 | 8.0              | > 256                  |
| <i>Abies balsamea</i> (L.) Mill.                      | <b>β-Pinene</b> (34.7), 3-carene (15.2), <b>α-pinene</b> (12.1), bornyl acetate (9.3), <b>limonene</b> (6.9), β-phellandrene (6.8), <b>camphene</b> (6.2) | 2.0                 | 2.0                 | 4.0              | > 256                  |
| <i>Amyris balsamifera</i> L.                          | Kusenol (22.8), 7-epi-α-eudesmol (12.1), elemol (10.5), γ-eudesmol (9.8), epi-γ-eudesmol (8.3), β-eudesmol (7.2), α-eudesmol (7.1)                        | 2.0                 | 1.0                 | 4.0              | > 256                  |
| <i>Apium graveolens</i> var. <i>dulce</i> (Mill.) DC. | <b>Limonene</b> (77.2), selinene (14.6)                                                                                                                   | > 8.0               | 2.0                 | 8.0              | > 256                  |
| <i>Artemisia herba-alba</i> Asso                      | α-Thujone (64.5), camphor (15.7), β-thujone (10.6)                                                                                                        | 2.0                 | 2.0                 | 4.0              | > 256                  |
| <i>Canarium luzonicum</i> (Blume) A. Gray             | <b>Limonene</b> (51.1), elemol (12.7), α-phellandrene (10.8), elemicin (5.6)                                                                              | > 8.0               | <b>1.0</b>          | 4.0              | > 256                  |
| <i>Cedrelopsis grevei</i> Baill. and Courchet         | Ishwarane (23.3), α-copaene (9.4), β-elemene (9.2), α-ylangene (6.9), curcumene (5.7)                                                                     | <b>1.0</b>          | 2.0                 | 4.0              | > 256                  |
| <i>Cinnamomum camphora</i> (L.) J. Presl (CT cineole) | <b>1,8-Cineole</b> (58.3), <b>sabinene</b> (12.7), α-terpineol (7.8), <b>α-pinene</b> (4.5)                                                               | <b>1.0</b>          | <b>1.0</b>          | > 8.0            | > 256                  |

|                                                          |                                                                                                                                                                              |            |             |             |             |
|----------------------------------------------------------|------------------------------------------------------------------------------------------------------------------------------------------------------------------------------|------------|-------------|-------------|-------------|
| <i>Cinnamomum camphora</i> (L.) J. Presl (CT linalool)   | <b>Linalool</b> (99.1)                                                                                                                                                       | 2.0        | <b>1.0</b>  | 4.0         | > 256       |
| <i>Cinnamomum cassia</i> (L.) J. Presl                   | Cinnamaldehyde (81.2), 2-methoxycinnamaldehyde (12.0)                                                                                                                        | 2.0        | <b>0.50</b> | <b>1.0</b>  | <b>4.00</b> |
| <i>Cinnamomum zeylanicum</i> Blume (bark)                | Methyl methanthranilate (42.7), cinnamaldehyde (24.3), <b><math>\gamma</math>-terpinene</b> (11.3), <b>limonene</b> (4.3)                                                    | <b>1.0</b> | <b>0.50</b> | <b>0.25</b> | <b>8.00</b> |
| <i>Cinnamomum zeylanicum</i> Blume (leaf)                | Eugenol (83.0)                                                                                                                                                               | 2.0        | <b>1.0</b>  | <b>1.0</b>  | > 256       |
| <i>Citrus aurantium</i> subsp. <i>amara</i> (Link) Engl. | <b>Linalool</b> (43.0), <b>limonene</b> (18.4), <b><math>\beta</math>-pinene</b> (12.7), <b><math>\gamma</math>-terpinene</b> (4.7), terpinyl acetate (4.5), nerolidol (4.0) | 4.0        | <b>1.0</b>  | 4.0         | > 256       |
| <i>Citrus paradisi</i> Macfad.                           | <b>Limonene</b> (83.7)                                                                                                                                                       | 2.0        | 2.0         | 4.0         | > 256       |
| <i>Citrus reticulata</i> Blanco                          | <b>Limonene</b> (71.4), <b><math>\gamma</math>-terpinene</b> (16.3)                                                                                                          | > 8.0      | 2.0         | 4.0         | > 256       |
| <i>Copaifera officinalis</i> L.                          | $\beta$ -Caryophyllene (58.8), $\alpha$ -humulene (7.1), $\gamma$ -muurolene (7.1), $\alpha$ -copaene (5.3)                                                                  | > 8.0      | 2.0         | 8.0         | > 256       |
| <i>Coriandrum sativum</i> L.                             | <b>Linalool</b> (40.0), decenol (18.4), decenal (14.1), decanal (5.6), <b><math>\gamma</math>-terpinene</b> (4.3)                                                            | <b>1.0</b> | 2.0         | 8.0         | > 256       |
| <i>Crithmum maritimum</i> L.                             | <b><math>\gamma</math>-Terpinene</b> (45.4), $\beta$ -phellandrene (16.3), thymol methyl ether (9.1), <i>p</i> -cymene (7.4), apiol (6.3), <b>sabinene</b> (4.2)             | 2.0        | 2.0         | 4.0         | > 256       |
| <i>Cymbopogon citratus</i> (DC.) Stapf                   | Geranial (47.5), neral (30.1), <b>limonene</b> (5.3)                                                                                                                         | 2.0        | <b>0.50</b> | <b>1.0</b>  | > 256       |
| <i>Cymbopogon flexuosus</i> (Nees ex Steud.) W. Watson   | Geranial (49.5), neral (31.7)                                                                                                                                                | <b>1.0</b> | <b>1.0</b>  | 2.0         | 256         |
| <i>Cymbopogon giganteus</i> Chiov.                       | <i>Trans-p</i> -mentha-1(7),8-dien-2-ol (22.3), <i>trans-p</i> -mentha-2,8-dien-1-ol (19.8), <i>cis-p</i> -mentha-1(7),8-                                                    | 2.0        | <b>0.50</b> | <b>1.0</b>  | > 256       |

|                                                                    |                                                                                                                              |            |            |             |       |
|--------------------------------------------------------------------|------------------------------------------------------------------------------------------------------------------------------|------------|------------|-------------|-------|
|                                                                    | dien-2-ol (18.7), <b>limonene</b> (12.0), <i>cis-p</i> -mentha-2,8-dien-1-ol (9.9)                                           |            |            |             |       |
| <i>Cymbopogon martinii</i> var. <i>motia</i>                       | Citronellal (37.3), geraniol (23.4), citronellol (12.2)                                                                      | 2.0        | <b>1.0</b> | 4.0         | > 256 |
| <i>Cymbopogon winterianus</i> Jowitt<br>ex Bor                     | Geraniol (81.9), geranyl butyrate (9.0)                                                                                      | <b>1.0</b> | <b>1.0</b> | <b>0.50</b> | > 256 |
| <i>Daucus carota</i> L.                                            | Carotol (47.6), <b><math>\alpha</math>-pinene</b> (8.6), $\beta$ -caryophyllene (6.0)                                        | <b>1.0</b> | 2.0        | 8.0         | > 256 |
| <i>Elettaria cardamomum</i> (L.)<br>Maton                          | Terpinyl acetate (43.9), <b>1,8-cineole</b> (32.0), linalyl acetate (5.5)                                                    | 2.0        | 2.0        | 2.0         | > 256 |
| <i>Eucalyptus citriodora</i> Hook.                                 | Citronellal (83.7)                                                                                                           | 4.0        | <b>1.0</b> | 4.0         | > 256 |
| <i>Eucalyptus dives</i> Schauer                                    | Piperitone (42.9), $\alpha$ -phellandrene (20.6), <b>1,8-cineole</b> (10.9), terpinen-4-ol (5.4)                             | <b>1.0</b> | <b>1.0</b> | > 8.0       | > 256 |
| <i>Eucalyptus globulus</i> Labill.                                 | <b>1,8-Cineole</b> (81.7), <b>limonene</b> (8.1)                                                                             | > 8.0      | 2.0        | > 8.0       | > 256 |
| <i>Eucalyptus radiata</i> A. Cunn. ex<br>DC.                       | <b>1,8-Cineole</b> (69.5), $\alpha$ -terpineol (13.7), <b>limonene</b> (5.3)                                                 | 2.0        | 2.0        | > 8.0       | > 256 |
| <i>Eucalyptus smithii</i> F. Muell. ex<br>R.T. Baker               | <b>1,8-Cineole</b> (81.7), <b>limonene</b> (5.6)                                                                             | 4.0        | <b>1.0</b> | > 8.0       | > 256 |
| <i>Eugenia caryophyllus</i> (Spreng.)<br>Bullock and S.G. Harrison | Eugenol (81.5), isoeugenol (14.3)                                                                                            | 2.0        | <b>1.0</b> | <b>1.0</b>  | > 256 |
| <i>Foeniculum vulgare</i> Mill.                                    | <i>Trans</i> -anethole (88.4)                                                                                                | 2.0        | 4.0        | 8.0         | > 256 |
| <i>Illicium verum</i> Hook.f.                                      | <i>Trans</i> -anethole (94.0)                                                                                                | 2.0        | 4.0        | 2.0         | > 256 |
| <i>Jasminum officinale</i> L.                                      | Benzyl acetate (32.1), isophytol (17.5), <b>linalool</b> (7.8), <i>cis</i> -jasmone (5.9), neophytadiene (5.4), indole (4.3) | <b>1.0</b> | <b>1.0</b> | 2.0         | 256   |

|                                                                       |                                                                                                                                                                                   |             |             |             |             |
|-----------------------------------------------------------------------|-----------------------------------------------------------------------------------------------------------------------------------------------------------------------------------|-------------|-------------|-------------|-------------|
| <i>Juniperus communis</i> L.                                          | <b><math>\alpha</math>-Pinene</b> (38.4), <b>sabinene</b> (9.6), <b><math>\gamma</math>-terpinene</b> (6.1), <b>limonene</b> (5.5), myrcene (4.2)                                 | 2.0         | 2.0         | 4.0         | > 256       |
| <i>Juniperus communis</i> var. <i>alpina</i> Suter                    | <b>Limonene</b> (28.5), $\beta$ -phellandrene (16.7), terpinyl acetate (15.1), <b><math>\alpha</math>-pinene</b> (10.0), <b>sabinene</b> (4.5)                                    | 4.0         | 2.0         | 8.0         | > 256       |
| <i>Juniperus oxycedrus</i> L.                                         | $\beta$ -cadinene (32.1), cubenol+1-epi cubenol (15.6), $\beta$ -caryophyllene (6.2), cadina-1(6),4-diene (5.9), $\alpha$ -caryophyllene (5.0)                                    | 4.0         | <b>1.0</b>  | 4.0         | > 256       |
| <i>Juniperus virginiana</i> L.                                        | Thujopsene (30.0), $\alpha$ -cedrene (25.2), cedrol (20.0), $\beta$ -cedrene (5.4)                                                                                                | <b>1.0</b>  | <b>1.0</b>  | 2.0         | > 256       |
| <i>Laurus nobilis</i> L.                                              | <b>1,8-Cineole</b> (47.0), terpinyl acetate (15.0), <b>sabinene</b> (7.4), <b><math>\beta</math>-pinene</b> (4.2), <b>linalool</b> (4.3), <b><math>\alpha</math>-pinene</b> (4.1) | <b>1.0</b>  | 2.0         | 4.0         | > 256       |
| <i>Lavandula</i> $\times$ <i>burnatii</i> Briq. clone <i>abrialis</i> | <b>Linalool</b> (38.9), linalyl acetate (21.5), camphor (4.2)                                                                                                                     | 4.0         | 2.0         | 4.0         | > 256       |
| <i>Lavandula</i> $\times$ <i>burnatii</i> Briq. clone <i>super</i>    | <b>Linalool</b> (40.8), linalyl acetate (38.9), camphor (4.7)                                                                                                                     | > 8.0       | <b>1.0</b>  | 8.0         | > 256       |
| <i>Lavandula angustifolia</i> Mill.                                   | <b>Linalool</b> (40.4), linalyl acetate (36.5), $\beta$ -caryophyllene (4.3)                                                                                                      | 2.0         | <b>1.0</b>  | 2.0         | > 256       |
| <i>Lavandula stoechas</i> L.                                          | Camphor (32.8), frenchone (27.2), <b>1,8-cineole</b> (6.7), <b>camphene</b> (4.2)                                                                                                 | 2.0         | 2.0         | 4.0         | > 256       |
| <i>Leptospermum petersonii</i> F.M. Bailey                            | Geranial (37.2), neral (23.2), citronellal (20.8)                                                                                                                                 | <b>1.0</b>  | <b>1.0</b>  | 2.0         | > 256       |
| <i>Levisticum officinale</i> W.D.J. Koch                              | 5-Heptylcyclohexa-1,3-diene (26.4), acetophenone (10.6), $\beta$ -phellandrene (6.9), vinylguaiacol (6.5),                                                                        | <b>0.50</b> | <b>0.50</b> | <b>0.50</b> | <b>4.00</b> |

|                                                               |                                                                                                                                                                                               |            |             |             |       |
|---------------------------------------------------------------|-----------------------------------------------------------------------------------------------------------------------------------------------------------------------------------------------|------------|-------------|-------------|-------|
|                                                               | terpinyl acetate (5.2), amyl benzene (5.0), furfural (4.6), terpinen-4-ol (4.0)                                                                                                               |            |             |             |       |
| <i>Lippia citriodora</i> (Palau) Kunth                        | <b>Limonene</b> (22.1), geranial (10.4), <b>1,8-cineole</b> (6.9), neral (6.9), $\beta$ -caryophyllene (6.5)                                                                                  | 2.0        | 2.0         | 2.0         | > 256 |
| <i>Litsea citrata</i> Blume                                   | Ligustilide (54.4), geranial (18.0), neral (12.2), <b>limonene</b> (5.5)                                                                                                                      | 2.0        | <b>0.50</b> | 2.0         | > 256 |
| <i>Matricaria recutita</i> L.                                 | $\beta$ -Farnesene (54.1), $\alpha$ -bisabolol oxide b (11.0), $\alpha$ -bisabolol (8.4), $\alpha$ -farnesene (8.2), $\gamma$ -muurolene (5.6),                                               | 2.0        | 2.0         | 2.0         | 256   |
| <i>Melaleuca alternifolia</i> (Maiden and Betche) Cheel       | Terpinen-4-ol (45.7), <b><math>\gamma</math>-terpinene</b> (20.6), $\alpha$ -terpinene (9.3)                                                                                                  | 2.0        | <b>1.0</b>  | 2.0         | > 256 |
| <i>Melaleuca cajuputi</i> Powell                              | <b>1,8-Cineole</b> (72.2), <b>limonene</b> (6.7), $\alpha$ -terpineol (6.9)                                                                                                                   | 4.0        | 4.0         | 4.0         | > 256 |
| <i>Melaleuca quinquenervia</i> (Cav.) S.T. Blake (CT cineole) | <b>1,8-Cineole</b> (59.2), $\alpha$ -terpineol (8.5), <b>limonene</b> (6.9), <b><math>\alpha</math>-pinene</b> (6.7), viridiflorol (5.4)                                                      | <b>1.0</b> | 2.0         | 8.0         | > 256 |
| <i>Mentha × citrata</i> Ehrh.                                 | Linalyl acetate (41.1), <b>linalool</b> (33.8)                                                                                                                                                | 2.0        | 2.0         | 4.0         | > 256 |
| <i>Mentha × piperita</i> L.                                   | Menthol (32.6), menthone (32.2), menthyl acetate (5.5), <b>1,8-cineole</b> (5.5), isomenthone (4.8)                                                                                           | 2.0        | 2.0         | 4.0         | > 256 |
| <i>Mentha pulegium</i> L.                                     | Pulegone (87.7)                                                                                                                                                                               | 2.0        | 2.0         | 2.0         | > 256 |
| <i>Mentha spicata</i> L.                                      | Carvone (61.6), carveol (13.8), <b>limonene</b> (12.6)                                                                                                                                        | 4.0        | <b>1.0</b>  | 2.0         | > 256 |
| <i>Myristica fragrans</i> Houtt.                              | <b><math>\alpha</math>-Pinene</b> (22.1), <b>sabinene</b> (15.4), <b><math>\beta</math>-pinene</b> (14.6), myristicin (10.4), terpinen-4-ol (8.2), <b><math>\gamma</math>-terpinene</b> (5.0) | > 8.0      | <b>1.0</b>  | 8.0         | > 256 |
| <i>Myrtus communis</i> L. (CT cineole)                        | <b><math>\alpha</math>-Pinene</b> (50.5), <b>1,8-cineole</b> (25.7), <b>limonene</b> (10.4)                                                                                                   | > 8.0      | <b>1.0</b>  | <b>0.50</b> | > 256 |

|                                                           |                                                                                                                                                                                                |            |            |            |       |
|-----------------------------------------------------------|------------------------------------------------------------------------------------------------------------------------------------------------------------------------------------------------|------------|------------|------------|-------|
| <i>Myrtus communis</i> L. (CT myrtenyl acetaat)           | <b>1,8-Cineole</b> (26.9), <b><math>\alpha</math>-pinene</b> (18.0), myrtenyl acetate (17.7), neryl acetate (11.2), <b>limonene</b> (9.8)                                                      | 2.0        | <b>1.0</b> | > 8.0      | > 256 |
| <i>Nardostachys jatamansi</i> (D. Don) DC.                | $\beta$ -Gurjunene (13.1), guaia-6,9-diene (7.0), jatamansone (6.0)                                                                                                                            | <b>1.0</b> | 2.0        | 4.0        | > 256 |
| <i>Ocimum basilicum</i> L.                                | Estragole (74.0), <b>linalool</b> (19.6)                                                                                                                                                       | 4.0        | <b>1.0</b> | 4.0        | > 256 |
| <i>Origanum majorana</i> L. (CT thujanol)                 | <i>Trans</i> -sabinene hydrate (23.8), terpinen-4-ol (23.5), <b><math>\gamma</math>-terpinene</b> (10.3), $\alpha$ -terpinene (6.6), <b>sabinene</b> (6.4), <i>cis</i> -sabinene hydrate (4.2) | <b>1.0</b> | <b>1.0</b> | 2.0        | > 256 |
| <i>Origanum majorana</i> L.                               | Terpinen-4-ol (28.5), <i>trans</i> -sabinene hydrate (17.0), <b><math>\gamma</math>-terpinene</b> (13.3), $\alpha$ -terpinene (7.6), <b>sabinene</b> (6.8), <i>cis</i> -sabinene hydrate (4.6) | 2.0        | <b>1.0</b> | <b>1.0</b> | > 256 |
| <i>Pelargonium asperum</i> Willd.                         | Citronellol (37.5), citronellyl formate (9.3), eudesmol (7.0), isomenthone (5.7),                                                                                                              | 2.0        | <b>1.0</b> | 2.0        | > 256 |
| <i>Petroselinum crispum</i> (Mill.) Fuss                  | $\alpha$ -Pinene (19.4), myristicine (15.2), <b><math>\beta</math>-pinene</b> (14.6), $\beta$ -phellandrene (8.8), p-mentha-1,3,8-triene (6.7), myrcene (4.8), allyltetramethoxybenzene (4.1)  | 2.0        | 2.0        | 2.0        | > 256 |
| <i>Picea mariana</i> (Mill.) Britton, Sterns and Poggenb. | Bornyl acetate (30.7), <b>camphene</b> (20.7), <b><math>\alpha</math>-pinene</b> (14.7), d-3-carene (6.8)                                                                                      | > 8.0      | 2.0        | 8.0        | > 256 |
| <i>Pinus pinaster</i> Aiton                               | <b><math>\alpha</math>-Pinene</b> (75.1), <b><math>\beta</math>-pinene</b> (17.4)                                                                                                              | > 8.0      | <b>1.0</b> | 8.0        | > 256 |
| <i>Pinus ponderosa</i> Douglas ex C. Lawson               | <b><math>\beta</math>-Pinene</b> (39.4), estragole (20.2), d-3-carene (18.6), <b><math>\alpha</math>-pinene</b> (8.7)                                                                          | <b>1.0</b> | 2.0        | 2.0        | > 256 |
| <i>Pinus sylvestris</i> L.                                | <b><math>\alpha</math>-Pinene</b> (40.6), <b><math>\beta</math>-pinene</b> (25.7), <b>limonene</b> (8.9), myrcene (5.1)                                                                        | 2.0        | 2.0        | 8.0        | > 256 |

|                                                 |                                                                                                                                                                   |            |             |     |       |
|-------------------------------------------------|-------------------------------------------------------------------------------------------------------------------------------------------------------------------|------------|-------------|-----|-------|
| <i>Pogostemon cablin</i> (Blanco) Benth.        | Patchoulol (34.5), $\alpha$ -bulnesene (18.6), $\alpha$ -guaiene (14.8), seychellene (8.4), $\alpha$ -patchoulene (5.1)                                           | <b>1.0</b> | 2.0         | 8.0 | 256   |
| <i>Rosmarinus officinalis</i> L. (CT cineole)   | <b>1,8-Cineole</b> (48.7), camphor (11.9), <b><math>\alpha</math>-pinene</b> (10.7), <b><math>\beta</math>-pinene</b> (6.1), $\beta$ -caryophyllene (4.9)         | 4.0        | <b>1.0</b>  | 4.0 | > 256 |
| <i>Rosmarinus officinalis</i> L. (CT kamfer)    | <b><math>\alpha</math>-Pinene</b> (22.4), <b>1,8-cineole</b> (22.3), camphor (19.9), <b>camphene</b> (9.7), <b>limonene</b> (4.4)                                 | 4.0        | <b>1.0</b>  | 2.0 | > 256 |
| <i>Rosmarinus officinalis</i> L. (CT verbenone) | <b><math>\alpha</math>-Pinene</b> (37.5), bornyl acetate (9.7), <b>camphene</b> (9.2), camphor (7.7), isoborneol (6.1), <b>1,8-cineole</b> (6.0), verbenone (4.4) | > 8.0      | 2.0         | 8.0 | > 256 |
| <i>Salvia lavandulifolia</i> Vahl               | Camphor (33.5), <b>1,8-cineole</b> (29.0), <b>camphene</b> (6.5), <b>limonene</b> (4.7)                                                                           | <b>1.0</b> | 2.0         | 8.0 | > 256 |
| <i>Salvia officinalis</i> L.                    | $\alpha$ -Thujone (45.4), $\beta$ -thujone (16.4), <b>1,8-cineole</b> (12.1), $\beta$ -caryophyllene (5.4)                                                        | 2.0        | 2.0         | 4.0 | > 256 |
| <i>Salvia sclarea</i> L.                        | Linalyl acetate (76.7), <b>linalool</b> (15.6)                                                                                                                    | > 8.0      | 2.0         | 8.0 | > 256 |
| <i>Satureja hortensis</i> L.                    | <b><math>\gamma</math>-Terpinene</b> (39.3), carvacrol (34.7), <i>p</i> -cymene (11.9)                                                                            | <b>1.0</b> | <b>1.0</b>  | 4.0 | > 256 |
| <i>Satureja montana</i> L.                      | Carvacrol (50.4), <b><math>\gamma</math>-terpinene</b> (16.5), <i>p</i> -cymene (14.2)                                                                            | <b>1.0</b> | <b>0.50</b> | 2.0 | > 256 |
| <i>Solidago canadensis</i> L.                   | Bicyclosesquiphellandrene (31.9), <b><math>\alpha</math>-pinene</b> (12.7), <b>limonene</b> (10.2), myrcene (7.4), <b>sabinene</b> (4.6), bornyl acetate (4.5)    | > 8.0      | 2.0         | 8.0 | > 256 |
| <i>Thuja occidentalis</i> L.                    | $\alpha$ -Thujone (51.3), frenchone (16.4), $\beta$ -thujone (7.2), benzyl benzoate (5.4), <b>sabinene</b> (4.0)                                                  | > 8.0      | 2.0         | 8.0 | > 256 |

|                                        |                                                                                                                                                                                                        |            |            |            |       |
|----------------------------------------|--------------------------------------------------------------------------------------------------------------------------------------------------------------------------------------------------------|------------|------------|------------|-------|
| <i>Thymus saturejoides</i> Coss.       | $\alpha$ -Terpineol (16.0), borneol (15.2), <b>camphene</b> (10.5), $\beta$ -caryophyllene (10.2), thymol (9.3), <b>linalool</b> (6.3), <b><math>\beta</math>-pinene</b> (5.7), <i>p</i> -cymene (5.5) | 2.0        | 2.0        | <b>1.0</b> | > 256 |
| <i>Thymus vulgaris</i> L. (CT thymol)  | Thymol (40.8), <i>p</i> -cymene (26.5), <b><math>\gamma</math>-terpinene</b> (10.8)                                                                                                                    | 2.0        | <b>1.0</b> | <b>1.0</b> | > 256 |
| <i>Thymus zygis</i> L.                 | Thymol (53.1), <i>p</i> -cymene (20.7), <b><math>\gamma</math>-terpinene</b> (5.8), <b>linalool</b> (4.2)                                                                                              | <b>1.0</b> | <b>1.0</b> | 2.0        | > 256 |
| <i>Trachyspermum ammi</i> (L.) Sprague | Thymol (37.8), <b><math>\gamma</math>-terpinene</b> (33.8), <i>p</i> -cymene (22.3)                                                                                                                    | <b>1.0</b> | <b>1.0</b> | 8.0        | > 256 |
| <i>Tsuga canadensis</i> (L.) Carrière  | Bornyl acetate (34.8), <b><math>\alpha</math>-pinene</b> (19.2), <b>camphene</b> (15.0), tricyclene (5.9)                                                                                              | 4.0        | 4.0        | 8.0        | > 256 |
| <i>Valeriana officinalis</i> L.        | Bornyl acetate (39.9), <b>camphene</b> (23.0), <b><math>\beta</math>-pinene</b> (4.1)                                                                                                                  | > 8.0      | 2.0        | 8.0        | > 256 |
| Rifampicin (mg/mL)                     |                                                                                                                                                                                                        | 0.25       | 0.0125     | 0.50       | 0.004 |
| Ciprofloxacin (mg/mL)                  |                                                                                                                                                                                                        | 3.125      | 3.125      | 0.156      | -     |
| Ethambutol ( $\mu$ g/mL)               |                                                                                                                                                                                                        | -          | -          | -          | 2.00  |
| Streptomycin ( $\mu$ g/mL)             |                                                                                                                                                                                                        | -          | -          | -          | 2.00  |
| Isoniazid ( $\mu$ g/mL)                |                                                                                                                                                                                                        | -          | -          | -          | 0.25  |

The most frequently occurring compounds and noteworthy MIC values are indicated in bold.



**Table S2.** The identified potential targets from using target identification algorithm implemented in ChEMBL. The entry corresponding to Mycobacterium tuberculosis is highlighted in bold.

| Target        | Predicted Target Name                            | Organism               | Confidence 70% | Confidence 80% | Confidence 90% | Activity Threshold |
|---------------|--------------------------------------------------|------------------------|----------------|----------------|----------------|--------------------|
| CHEMBL1907591 | Neuronal acetylcholine receptor; alpha4/beta4    | Homo sapiens           | empty          | active         | both           | 5                  |
| CHEMBL2590    | Aminopeptidase N                                 | Sus scrofa             | empty          | active         | both           | 6                  |
| CHEMBL4244    | Legumain                                         | Homo sapiens           | active         | active         | both           | 6.5                |
| CHEMBL3891    | Calpain 1                                        | Homo sapiens           | empty          | active         | both           | 6                  |
| CHEMBL2966    | Adenosine deaminase                              | Bos taurus             | active         | active         | active         | 6                  |
| CHEMBL4086    | Prostanoid EP4 receptor                          | Rattus norvegicus      | active         | active         | active         | 7                  |
| CHEMBL1899    | Serotonin 3a (5-HT3a) receptor                   | Homo sapiens           | active         | active         | active         | 5                  |
| CHEMBL2304402 | Phosphodiesterase 5A                             | Canis lupus familiaris | empty          | active         | active         | 6.5                |
| CHEMBL5568    | Proto-oncogene tyrosine-protein kinase ROS       | Homo sapiens           | active         | active         | active         | 6.5                |
| CHEMBL1907588 | Acetylcholine receptor; alpha1/beta1/delta/gamma | Homo sapiens           | active         | active         | active         | 5                  |
| CHEMBL2283    | Carbonic anhydrase II                            | Bos taurus             | inactive       | both           | both           | 6                  |
| CHEMBL4556    | Glycine transporter 1                            | Rattus norvegicus      | empty          | both           | both           | 6                  |
| CHEMBL4349    | N-acylsphingosine-amidohydrolase                 | Homo sapiens           | empty          | both           | both           | 6                  |
| CHEMBL2390810 | Microtubule-associated protein 2                 | Homo sapiens           | empty          | empty          | inactive       | 6                  |
| CHEMBL5062    | Coagulation factor X                             | Oryctolagus cuniculus  | empty          | empty          | empty          | 6.5                |
| CHEMBL4793    | Dipeptidyl peptidase IX                          | Homo sapiens           | empty          | empty          | active         | 6                  |
| CHEMBL1907596 | Neuronal acetylcholine receptor; alpha4/beta2    | Rattus norvegicus      | empty          | empty          | both           | 5                  |
| CHEMBL5077    | Butyrylcholinesterase                            | Equus caballus         | empty          | empty          | both           | 6                  |

|               |                                               |                         |       |       |          |     |
|---------------|-----------------------------------------------|-------------------------|-------|-------|----------|-----|
| CHEMBL1944    | Neprilysin                                    | Homo sapiens            | empty | empty | inactive | 6   |
| CHEMBL1907594 | Neuronal acetylcholine receptor; alpha3/beta4 | Homo sapiens            | empty | empty | both     | 5   |
| CHEMBL1907595 | Neuronal acetylcholine receptor; alpha4/beta4 | Rattus norvegicus       | empty | empty | inactive | 5   |
| CHEMBL3199    | Acetylcholinesterase                          | Rattus norvegicus       | empty | empty | both     | 6   |
| CHEMBL3589    | Adenosine kinase                              | Homo sapiens            | empty | empty | both     | 6   |
| CHEMBL3403    | Butyrylcholinesterase                         | Rattus norvegicus       | empty | empty | inactive | 6   |
| CHEMBL4653    | Dipeptidyl peptidase IV                       | Rattus norvegicus       | empty | empty | inactive | 6   |
| CHEMBL278     | Integrin alpha-4                              | Homo sapiens            | empty | empty | empty    | 6.5 |
| CHEMBL4336    | Prostanoid EP3 receptor                       | Mus musculus            | empty | empty | inactive | 7   |
| CHEMBL3922    | Methionine aminopeptidase 2                   | Homo sapiens            | empty | empty | both     | 6   |
| CHEMBL5163    | Sodium channel protein type III alpha subunit | Homo sapiens            | empty | empty | inactive | 5   |
| CHEMBL2096675 | Integrin alpha-V/beta-5                       | Homo sapiens            | empty | empty | both     | 6   |
| CHEMBL4657    | Dipeptidyl peptidase VIII                     | Homo sapiens            | empty | empty | active   | 6   |
| CHEMBL2411    | Serotonin 3a (5-HT3a) receptor                | Rattus norvegicus       | empty | empty | inactive | 6.5 |
| CHEMBL2363    | Dihydrofolate reductase                       | Rattus norvegicus       | empty | empty | both     | 6   |
| CHEMBL2304404 | Adenosine A1 receptor                         | Cavia porcellus         | empty | empty | both     | 6   |
| CHEMBL311     | Glutamate [NMDA] receptor subunit epsilon 2   | Rattus norvegicus       | empty | empty | empty    | 5   |
| CHEMBL276     | Muscarinic acetylcholine receptor M1          | Rattus norvegicus       | empty | empty | active   | 7   |
| CHEMBL2575    | Dihydrofolate reductase                       | Gallus gallus           | empty | empty | inactive | 6   |
| CHEMBL3085613 | DNA gyrase subunit B                          | Mycobacterium smegmatis | empty | empty | inactive | 6   |
| CHEMBL1782    | Farnesyl diphosphate synthase                 | Homo sapiens            | empty | empty | inactive | 6   |

|            |                                                         |                                                                    |          |          |          |     |
|------------|---------------------------------------------------------|--------------------------------------------------------------------|----------|----------|----------|-----|
| CHEMBL2288 | Peptidyl-prolyl cis-trans isomerase NIMA-interacting 1  | Homo sapiens                                                       | empty    | empty    | both     | 6   |
| CHEMBL5457 | Dihydrofolate reductase                                 | Mycobacterium avium                                                | empty    | empty    | empty    | 6   |
| CHEMBL1947 | Thyroid hormone receptor beta-1                         | Homo sapiens                                                       | empty    | inactive | inactive | 7   |
| CHEMBL226  | Adenosine A1 receptor                                   | Homo sapiens                                                       | inactive | inactive | inactive | 7   |
| CHEMBL4618 | Leukotriene A4 hydrolase                                | Homo sapiens                                                       | inactive | inactive | inactive | 6   |
| CHEMBL1827 | Phosphodiesterase 5A                                    | Homo sapiens                                                       | inactive | inactive | inactive | 6   |
| CHEMBL3771 | Human herpes virus 5 capsid protein P40                 | Human cytomegalovirus (strain AD169) (HHV-5) (Human herpesvirus 5) | inactive | inactive | inactive | 6   |
| CHEMBL5658 | Prostaglandin E synthase                                | Homo sapiens                                                       | inactive | inactive | inactive | 6   |
| CHEMBL3229 | Anandamide amidohydrolase                               | Rattus norvegicus                                                  | inactive | inactive | inactive | 6   |
| CHEMBL4234 | Estradiol 17-beta-dehydrogenase 3                       | Homo sapiens                                                       | inactive | inactive | inactive | 6   |
| CHEMBL4552 | Peripheral-type benzodiazepine receptor                 | Rattus norvegicus                                                  | inactive | inactive | inactive | 6   |
| CHEMBL5103 | Histone deacetylase 10                                  | Homo sapiens                                                       | inactive | inactive | inactive | 6   |
| CHEMBL4779 | Papain                                                  | Carica papaya                                                      | inactive | inactive | inactive | 6   |
| CHEMBL2334 | Caspase-3                                               | Homo sapiens                                                       | inactive | inactive | inactive | 6   |
| CHEMBL5498 | Muscarinic acetylcholine receptor M3                    | Cavia porcellus                                                    | inactive | inactive | inactive | 7   |
| CHEMBL233  | Mu opioid receptor                                      | Homo sapiens                                                       | inactive | inactive | inactive | 7   |
| CHEMBL1991 | Inhibitor of nuclear factor kappa B kinase beta subunit | Homo sapiens                                                       | inactive | inactive | inactive | 7.5 |

|            |                                                                   |                   |          |          |          |     |
|------------|-------------------------------------------------------------------|-------------------|----------|----------|----------|-----|
| CHEMBL4816 | Serine/threonine-protein kinase<br>AKT3                           | Homo sapiens      | inactive | inactive | inactive | 7.5 |
| CHEMBL2056 | Dopamine D1 receptor                                              | Homo sapiens      | inactive | inactive | inactive | 7   |
| CHEMBL5936 | Toll-like receptor 7                                              | Homo sapiens      | inactive | inactive | inactive | 6   |
| CHEMBL231  | Histamine H1 receptor                                             | Homo sapiens      | inactive | inactive | inactive | 7   |
| CHEMBL219  | Dopamine D4 receptor                                              | Homo sapiens      | inactive | inactive | inactive | 7   |
| CHEMBL2487 | Beta amyloid A4 protein                                           | Homo sapiens      | empty    | inactive | inactive | 6   |
| CHEMBL1824 | Receptor protein-tyrosine kinase<br>erbB-2                        | Homo sapiens      | inactive | inactive | inactive | 7.5 |
| CHEMBL3969 | Carbonic anhydrase VB                                             | Homo sapiens      | inactive | inactive | inactive | 6   |
| CHEMBL2652 | Phosphodiesterase 2A                                              | Homo sapiens      | inactive | inactive | inactive | 6   |
| CHEMBL3202 | Prolyl endopeptidase                                              | Homo sapiens      | inactive | inactive | inactive | 6   |
| CHEMBL3571 | Cannabinoid CB1 receptor                                          | Rattus norvegicus | inactive | inactive | inactive | 7   |
| CHEMBL4550 | 5-lipoxygenase activating<br>protein                              | Homo sapiens      | inactive | inactive | inactive | 6   |
| CHEMBL3798 | Calcitonin gene-related peptide<br>type 1 receptor                | Homo sapiens      | inactive | inactive | inactive | 7   |
| CHEMBL218  | Cannabinoid CB1 receptor                                          | Homo sapiens      | inactive | inactive | inactive | 7   |
| CHEMBL2243 | Anandamide amidohydrolase                                         | Homo sapiens      | inactive | inactive | inactive | 6   |
| CHEMBL224  | Serotonin 2a (5-HT2a) receptor                                    | Homo sapiens      | inactive | inactive | inactive | 7   |
| CHEMBL6031 | Histone-lysine N-<br>methyltransferase, H3 lysine-9<br>specific 5 | Homo sapiens      | inactive | inactive | inactive | 6   |
| CHEMBL4801 | Caspase-1                                                         | Homo sapiens      | inactive | inactive | inactive | 6   |
| CHEMBL1951 | Monoamine oxidase A                                               | Homo sapiens      | inactive | inactive | inactive | 6   |
| CHEMBL4430 | Cytochrome P450 17A1                                              | Rattus norvegicus | inactive | inactive | inactive | 6   |
| CHEMBL4342 | Group X secretory<br>phospholipase A2                             | Homo sapiens      | inactive | inactive | inactive | 6   |

|               |                                                      |                     |          |          |          |     |
|---------------|------------------------------------------------------|---------------------|----------|----------|----------|-----|
| CHEMBL2111432 | PI3-kinase p110-delta/p85-alpha                      | Homo sapiens        | inactive | inactive | inactive | 6   |
| CHEMBL4408    | Phosphodiesterase 8B                                 | Homo sapiens        | inactive | inactive | inactive | 6   |
| CHEMBL1941    | Histamine H2 receptor                                | Homo sapiens        | inactive | inactive | inactive | 6.5 |
| CHEMBL208     | Progesterone receptor                                | Homo sapiens        | inactive | inactive | inactive | 7   |
| CHEMBL220     | Acetylcholinesterase                                 | Homo sapiens        | inactive | inactive | inactive | 6   |
| CHEMBL234     | Dopamine D3 receptor                                 | Homo sapiens        | inactive | inactive | inactive | 7   |
| CHEMBL1835    | Thromboxane-A synthase                               | Homo sapiens        | inactive | inactive | inactive | 6   |
| CHEMBL3788    | Serine/threonine-protein kinase<br>PLK4              | Homo sapiens        | inactive | inactive | inactive | 7.5 |
| CHEMBL4018    | Neuropeptide Y receptor type 2                       | Homo sapiens        | inactive | inactive | inactive | 7   |
| CHEMBL2327    | Neurokinin 2 receptor                                | Homo sapiens        | inactive | inactive | inactive | 7   |
| CHEMBL5689    | Tryptophan 5-hydroxylase 1                           | Homo sapiens        | inactive | inactive | inactive | 6   |
| CHEMBL2695    | Focal adhesion kinase 1                              | Homo sapiens        | inactive | inactive | inactive | 7.5 |
| CHEMBL2326    | Carbonic anhydrase VII                               | Homo sapiens        | inactive | inactive | inactive | 6   |
| CHEMBL3776    | Caspase-8                                            | Homo sapiens        | inactive | inactive | inactive | 6   |
| CHEMBL3004    | Multidrug resistance-associated<br>protein 1         | Homo sapiens        | inactive | inactive | inactive | 6   |
| CHEMBL4780    | Acetylcholinesterase                                 | Torpedo californica | inactive | inactive | inactive | 6   |
| CHEMBL4794    | Vanilloid receptor                                   | Homo sapiens        | inactive | inactive | inactive | 5   |
| CHEMBL1808    | Angiotensin-converting enzyme                        | Homo sapiens        | inactive | inactive | inactive | 6   |
| CHEMBL3979    | Peroxisome proliferator-<br>activated receptor delta | Homo sapiens        | inactive | inactive | inactive | 7   |
| CHEMBL235     | Peroxisome proliferator-<br>activated receptor gamma | Homo sapiens        | inactive | inactive | inactive | 7   |
| CHEMBL1983    | Serotonin 1d (5-HT1d) receptor                       | Homo sapiens        | inactive | inactive | inactive | 7   |
| CHEMBL1798    | Cysteinyl leukotriene receptor 1                     | Homo sapiens        | inactive | inactive | inactive | 7   |
| CHEMBL2736    | Metabotropic glutamate<br>receptor 4                 | Homo sapiens        | inactive | inactive | inactive | 7   |

|               |                                          |                   |          |          |          |     |
|---------------|------------------------------------------|-------------------|----------|----------|----------|-----|
| CHEMBL1942    | Alpha-2b adrenergic receptor             | Homo sapiens      | inactive | inactive | inactive | 7   |
| CHEMBL237     | Kappa opioid receptor                    | Homo sapiens      | inactive | inactive | inactive | 7   |
| CHEMBL223     | Alpha-1d adrenergic receptor             | Homo sapiens      | inactive | inactive | inactive | 7   |
| CHEMBL1822    | Inosine-5'-monophosphate dehydrogenase 1 | Homo sapiens      | inactive | inactive | both     | 6   |
| CHEMBL1836    | Prostanoid EP4 receptor                  | Homo sapiens      | inactive | inactive | inactive | 7   |
| CHEMBL3012    | Phosphodiesterase 7A                     | Homo sapiens      | inactive | inactive | inactive | 6   |
| CHEMBL5113    | Orexin receptor 1                        | Homo sapiens      | inactive | inactive | inactive | 7   |
| CHEMBL3563    | Cruzipain                                | Trypanosoma cruzi | inactive | inactive | inactive | 6   |
| CHEMBL3991    | Coagulation factor VII                   | Homo sapiens      | inactive | inactive | inactive | 6   |
| CHEMBL1163125 | Bromodomain-containing protein 4         | Homo sapiens      | inactive | inactive | inactive | 6   |
| CHEMBL4768    | Acetylcholinesterase                     | Bos taurus        | inactive | inactive | inactive | 6   |
| CHEMBL3952    | Kappa opioid receptor                    | Cavia porcellus   | inactive | inactive | inactive | 7   |
| CHEMBL3629    | Casein kinase II alpha                   | Homo sapiens      | inactive | inactive | inactive | 7.5 |
| CHEMBL222     | Norepinephrine transporter               | Homo sapiens      | inactive | inactive | inactive | 6   |
| CHEMBL236     | Delta opioid receptor                    | Homo sapiens      | inactive | inactive | inactive | 7   |
| CHEMBL4608    | Melanocortin receptor 5                  | Homo sapiens      | inactive | inactive | inactive | 7   |
| CHEMBL4191    | Monoglyceride lipase                     | Homo sapiens      | inactive | inactive | inactive | 6   |
| CHEMBL4422    | Free fatty acid receptor 1               | Homo sapiens      | inactive | inactive | inactive | 7   |
| CHEMBL3371    | Serotonin 6 (5-HT6) receptor             | Homo sapiens      | inactive | inactive | inactive | 7   |
| CHEMBL5983    | Aldo-keto reductase family 1 member B10  | Homo sapiens      | inactive | inactive | inactive | 6   |
| CHEMBL2034    | Glucocorticoid receptor                  | Homo sapiens      | inactive | inactive | inactive | 7   |
| CHEMBL286     | Renin                                    | Homo sapiens      | inactive | inactive | inactive | 6   |
| CHEMBL4860    | Apoptosis regulator Bcl-2                | Homo sapiens      | inactive | inactive | inactive | 5   |
| CHEMBL251     | Adenosine A2a receptor                   | Homo sapiens      | inactive | inactive | inactive | 7   |

|               |                                               |                                |          |          |          |     |
|---------------|-----------------------------------------------|--------------------------------|----------|----------|----------|-----|
| CHEMBL245     | Muscarinic acetylcholine receptor M3          | Homo sapiens                   | inactive | inactive | inactive | 7   |
| CHEMBL1850    | Dopamine D5 receptor                          | Homo sapiens                   | inactive | inactive | inactive | 7   |
| CHEMBL2007625 | Isocitrate dehydrogenase [NADP] cytoplasmic   | Homo sapiens                   | inactive | inactive | inactive | 6   |
| CHEMBL2366505 | Integrase                                     | Human immunodeficiency virus 1 | inactive | inactive | inactive | 6   |
| CHEMBL325     | Histone deacetylase 1                         | Homo sapiens                   | inactive | inactive | inactive | 6   |
| CHEMBL3048    | Nitric-oxide synthase, brain                  | Rattus norvegicus              | inactive | inactive | inactive | 6   |
| CHEMBL319     | Alpha-1a adrenergic receptor                  | Rattus norvegicus              | inactive | inactive | inactive | 7   |
| CHEMBL3706    | ADAM17                                        | Homo sapiens                   | inactive | inactive | inactive | 6   |
| CHEMBL2163176 | Lysine-specific demethylase 5C                | Homo sapiens                   | empty    | inactive | inactive | 6   |
| CHEMBL4530    | Coagulation factor XIII                       | Homo sapiens                   | inactive | inactive | inactive | 6   |
| CHEMBL2095178 | Protein farnesyltransferase                   | Bos taurus                     | inactive | inactive | inactive | 6.5 |
| CHEMBL1795101 | Peptide deformylase                           | Escherichia coli               | inactive | inactive | inactive | 6   |
| CHEMBL4040    | MAP kinase ERK2                               | Homo sapiens                   | inactive | inactive | inactive | 7.5 |
| CHEMBL244     | Coagulation factor X                          | Homo sapiens                   | inactive | inactive | inactive | 6   |
| CHEMBL4685    | Indoleamine 2,3-dioxygenase                   | Homo sapiens                   | inactive | inactive | inactive | 6   |
| CHEMBL287     | Sigma opioid receptor                         | Homo sapiens                   | inactive | inactive | inactive | 6   |
| CHEMBL3471    | Human immunodeficiency virus type 1 integrase | Human immunodeficiency virus 1 | inactive | inactive | inactive | 6   |
| CHEMBL2035    | Muscarinic acetylcholine receptor M5          | Homo sapiens                   | inactive | inactive | inactive | 7   |
| CHEMBL3459    | Serotonin 1b (5-HT1b) receptor                | Rattus norvegicus              | inactive | inactive | inactive | 6.5 |
| CHEMBL5028    | ADAM10                                        | Homo sapiens                   | empty    | inactive | both     | 6   |
| CHEMBL3473    | C-C chemokine receptor type 3                 | Homo sapiens                   | inactive | inactive | inactive | 7   |

|            |                                                                   |                          |          |          |          |     |
|------------|-------------------------------------------------------------------|--------------------------|----------|----------|----------|-----|
| CHEMBL285  | Acyl coenzyme A:cholesterol<br>acyltransferase 1                  | Rattus norvegicus        | inactive | inactive | inactive | 6   |
| CHEMBL4687 | Plasmepsin 1                                                      | Plasmodium<br>falciparum | inactive | inactive | inactive | 6   |
| CHEMBL4644 | Melanocortin receptor 3                                           | Homo sapiens             | inactive | inactive | inactive | 7   |
| CHEMBL246  | Beta-3 adrenergic receptor                                        | Homo sapiens             | inactive | inactive | inactive | 7   |
| CHEMBL252  | Endothelin receptor ET-A                                          | Homo sapiens             | inactive | inactive | inactive | 7   |
| CHEMBL332  | Matrix metalloproteinase-1                                        | Homo sapiens             | inactive | inactive | inactive | 6   |
| CHEMBL326  | Alpha-1d adrenergic receptor                                      | Rattus norvegicus        | inactive | inactive | inactive | 7   |
| CHEMBL4718 | MAP kinase-interacting<br>serine/threonine-protein kinase<br>MNK1 | Homo sapiens             | inactive | inactive | both     | 6.5 |
| CHEMBL5406 | Histone-arginine<br>methyltransferase CARM1                       | Homo sapiens             | empty    | inactive | inactive | 6   |
| CHEMBL4282 | Serine/threonine-protein kinase<br>AKT                            | Homo sapiens             | inactive | inactive | inactive | 7.5 |
| CHEMBL3710 | Prostanoid EP3 receptor                                           | Homo sapiens             | inactive | inactive | inactive | 7   |
| CHEMBL5375 | Hepatitis C virus NS5B RNA-<br>dependent RNA polymerase           | Hepatitis C virus        | inactive | inactive | inactive | 6   |
| CHEMBL333  | Matrix metalloproteinase-2                                        | Homo sapiens             | inactive | inactive | inactive | 6   |
| CHEMBL2208 | MAP kinase-activated protein<br>kinase 2                          | Homo sapiens             | inactive | inactive | inactive | 7.5 |
| CHEMBL3880 | Heat shock protein HSP 90-<br>alpha                               | Homo sapiens             | inactive | inactive | inactive | 6   |
| CHEMBL4123 | Neurotensin receptor 1                                            | Homo sapiens             | inactive | inactive | inactive | 7   |
| CHEMBL1926 | Dihydrofolate reductase                                           | Pneumocystis carinii     | inactive | inactive | inactive | 6   |
| CHEMBL284  | Dipeptidyl peptidase IV                                           | Homo sapiens             | inactive | inactive | inactive | 6   |
| CHEMBL5017 | Serotonin 4 (5-HT4) receptor                                      | Cavia porcellus          | inactive | inactive | inactive | 7   |



|               |                                                       |                                |          |          |          |     |
|---------------|-------------------------------------------------------|--------------------------------|----------|----------|----------|-----|
| CHEMBL243     | Human immunodeficiency virus type 1 protease          | Human immunodeficiency virus 1 | inactive | inactive | inactive | 6   |
| CHEMBL3884    | Sodium/glucose cotransporter 2                        | Homo sapiens                   | inactive | inactive | inactive | 6   |
| CHEMBL2366517 | Protease                                              | Human immunodeficiency virus 1 | inactive | inactive | inactive | 6   |
| CHEMBL1856    | Steroid 5-alpha-reductase 2                           | Homo sapiens                   | inactive | inactive | inactive | 6.5 |
| CHEMBL3933    | Prostanoid DP receptor                                | Mus musculus                   | inactive | inactive | inactive | 7   |
| CHEMBL3072    | Androgen Receptor                                     | Rattus norvegicus              | inactive | inactive | inactive | 7   |
| CHEMBL6136    | Lysine-specific histone demethylase 1                 | Homo sapiens                   | inactive | inactive | inactive | 6   |
| CHEMBL1881    | Prostanoid EP2 receptor                               | Homo sapiens                   | inactive | inactive | inactive | 7   |
| CHEMBL2095194 | Coagulation factor VII/tissue factor                  | Homo sapiens                   | inactive | inactive | inactive | 6   |
| CHEMBL4523    | Serine/threonine-protein kinase PIM2                  | Homo sapiens                   | inactive | inactive | inactive | 7.5 |
| CHEMBL2147    | Serine/threonine-protein kinase PIM1                  | Homo sapiens                   | inactive | inactive | inactive | 7.5 |
| CHEMBL2366516 | Reverse transcriptase                                 | Human immunodeficiency virus 1 | inactive | inactive | inactive | 6   |
| CHEMBL256     | Adenosine A3 receptor                                 | Homo sapiens                   | inactive | inactive | inactive | 7   |
| CHEMBL4132    | Voltage-gated L-type calcium channel alpha-1D subunit | Rattus norvegicus              | inactive | inactive | inactive | 5   |
| CHEMBL3649    | Xanthine dehydrogenase                                | Bos taurus                     | inactive | inactive | inactive | 6   |
| CHEMBL242     | Estrogen receptor beta                                | Homo sapiens                   | inactive | inactive | inactive | 7   |
| CHEMBL2094116 | Serotonin 3 (5-HT3) receptor                          | Rattus norvegicus              | empty    | inactive | inactive | 6.5 |

|               |                                                     |                          |          |          |          |     |
|---------------|-----------------------------------------------------|--------------------------|----------|----------|----------|-----|
| CHEMBL4330    | Cysteinyl leukotriene receptor 2                    | Homo sapiens             | inactive | inactive | inactive | 7   |
| CHEMBL5979    | Alkaline phosphatase, tissue-nonspecific isozyme    | Homo sapiens             | inactive | inactive | both     | 6   |
| CHEMBL3105    | Poly [ADP-ribose] polymerase-1                      | Homo sapiens             | inactive | inactive | inactive | 6   |
| CHEMBL268     | Cathepsin K                                         | Homo sapiens             | inactive | inactive | inactive | 6   |
| CHEMBL254     | Phosphodiesterase 4A                                | Homo sapiens             | inactive | inactive | inactive | 6   |
| CHEMBL3717    | Hepatocyte growth factor receptor                   | Homo sapiens             | inactive | inactive | inactive | 7.5 |
| CHEMBL4078    | Acetylcholinesterase                                | Electrophorus electricus | empty    | inactive | inactive | 6   |
| CHEMBL1795139 | Transmembrane protease serine 6                     | Homo sapiens             | inactive | inactive | inactive | 6   |
| CHEMBL2186    | Carbonic anhydrase XIII                             | Mus musculus             | inactive | inactive | both     | 6   |
| CHEMBL3501    | Cholecystokinin A receptor                          | Cavia porcellus          | inactive | inactive | inactive | 7   |
| CHEMBL2145    | Kynurenine 3-monooxygenase                          | Homo sapiens             | inactive | inactive | inactive | 6   |
| CHEMBL2622    | Aldose reductase                                    | Rattus norvegicus        | inactive | inactive | inactive | 6   |
| CHEMBL4247    | ALK tyrosine kinase receptor                        | Homo sapiens             | inactive | inactive | inactive | 7.5 |
| CHEMBL335     | Protein-tyrosine phosphatase 1B                     | Homo sapiens             | inactive | inactive | inactive | 6   |
| CHEMBL6120    | Solute carrier family 22 member 12                  | Homo sapiens             | inactive | inactive | inactive | 6   |
| CHEMBL4051    | Cystic fibrosis transmembrane conductance regulator | Homo sapiens             | inactive | inactive | both     | 5   |
| CHEMBL2434    | Interleukin-8 receptor B                            | Homo sapiens             | inactive | inactive | inactive | 7   |
| CHEMBL321     | Matrix metalloproteinase 9                          | Homo sapiens             | inactive | inactive | inactive | 6   |
| CHEMBL309     | Muscarinic acetylcholine receptor M2                | Rattus norvegicus        | inactive | inactive | both     | 7   |
| CHEMBL5373    | Cannabinoid CB2 receptor                            | Mus musculus             | inactive | inactive | inactive | 7   |

|               |                                               |                       |          |          |          |     |
|---------------|-----------------------------------------------|-----------------------|----------|----------|----------|-----|
| CHEMBL1868    | Vascular endothelial growth factor receptor 1 | Homo sapiens          | inactive | inactive | inactive | 7.5 |
| CHEMBL3892    | Sphingosine 1-phosphate receptor Edg-3        | Homo sapiens          | inactive | inactive | inactive | 7   |
| CHEMBL255     | Adenosine A2b receptor                        | Homo sapiens          | inactive | inactive | inactive | 7   |
| CHEMBL269     | Delta opioid receptor                         | Rattus norvegicus     | inactive | inactive | inactive | 7   |
| CHEMBL3474    | Phospholipase A2 group IIA                    | Homo sapiens          | inactive | inactive | inactive | 6   |
| CHEMBL5763    | Cholinesterase                                | Equus caballus        | empty    | inactive | inactive | 6   |
| CHEMBL3883328 | Casein kinase II alpha'/ beta                 | Homo sapiens          | inactive | inactive | inactive | 6.5 |
| CHEMBL2959    | Tyrosine-protein kinase ITK/TSK               | Homo sapiens          | inactive | inactive | inactive | 7.5 |
| CHEMBL3486    | Dihydroorotate dehydrogenase                  | Plasmodium falciparum | inactive | inactive | inactive | 6   |
| CHEMBL2954    | Cathepsin S                                   | Homo sapiens          | inactive | inactive | inactive | 6   |
| CHEMBL4699    | Isoprenylcysteine carboxyl methyltransferase  | Homo sapiens          | inactive | inactive | inactive | 6   |
| CHEMBL258     | Tyrosine-protein kinase LCK                   | Homo sapiens          | inactive | inactive | inactive | 7.5 |
| CHEMBL1865    | Histone deacetylase 6                         | Homo sapiens          | inactive | inactive | inactive | 6   |
| CHEMBL1871    | Androgen Receptor                             | Homo sapiens          | inactive | inactive | inactive | 7   |
| CHEMBL4074    | Angiotensin-converting enzyme                 | Oryctolagus cuniculus | inactive | inactive | inactive | 6   |
| CHEMBL338     | Dopamine transporter                          | Rattus norvegicus     | empty    | inactive | inactive | 6   |
| CHEMBL5815    | C-C chemokine receptor type 9                 | Homo sapiens          | inactive | inactive | inactive | 7   |
| CHEMBL2820    | Coagulation factor XI                         | Homo sapiens          | empty    | inactive | inactive | 6   |
| CHEMBL3242    | Carbonic anhydrase XII                        | Homo sapiens          | inactive | inactive | inactive | 6   |
| CHEMBL5141    | Cytochrome P450 26A1                          | Homo sapiens          | inactive | inactive | inactive | 6   |
| CHEMBL259     | Melanocortin receptor 4                       | Homo sapiens          | inactive | inactive | inactive | 7   |
| CHEMBL2564    | Metabotropic glutamate receptor 5             | Rattus norvegicus     | inactive | inactive | inactive | 7   |

|               |                                                  |                       |          |          |          |     |
|---------------|--------------------------------------------------|-----------------------|----------|----------|----------|-----|
| CHEMBL5747    | CREB-binding protein                             | Homo sapiens          | inactive | inactive | inactive | 6   |
| CHEMBL4465    | Acyl coenzyme A:cholesterol<br>acyltransferase 2 | Homo sapiens          | inactive | inactive | inactive | 6   |
| CHEMBL2000    | Plasma kallikrein                                | Homo sapiens          | inactive | inactive | inactive | 6   |
| CHEMBL2955    | Sphingosine 1-phosphate<br>receptor Edg-5        | Homo sapiens          | inactive | inactive | inactive | 7   |
| CHEMBL3038482 | DNA gyrase                                       | Staphylococcus aureus | inactive | inactive | inactive | 6   |
| CHEMBL2016    | Coagulation factor IX                            | Homo sapiens          | inactive | inactive | inactive | 6   |
| CHEMBL2002    | Inosine-5'-monophosphate<br>dehydrogenase 2      | Homo sapiens          | empty    | inactive | inactive | 6   |
| CHEMBL5023    | p53-binding protein Mdm-2                        | Homo sapiens          | inactive | inactive | inactive | 6   |
| CHEMBL298     | Cholecystokinin B receptor                       | Homo sapiens          | inactive | inactive | inactive | 7   |
| CHEMBL273     | Serotonin 1a (5-HT1a) receptor                   | Rattus norvegicus     | inactive | inactive | inactive | 7   |
| CHEMBL3650    | Fibroblast growth factor<br>receptor 1           | Homo sapiens          | inactive | inactive | inactive | 7.5 |
| CHEMBL313     | Serotonin transporter                            | Rattus norvegicus     | inactive | inactive | inactive | 6   |
| CHEMBL3132741 | Peregrin                                         | Homo sapiens          | inactive | inactive | inactive | 6   |
| CHEMBL2095172 | GABA-A receptor; alpha-1/beta-<br>2/gamma-2      | Homo sapiens          | inactive | inactive | inactive | 5   |
| CHEMBL2010636 | Class 1 phosphodiesterase<br>PDEB1               | Trypanosoma brucei    | inactive | inactive | inactive | 6   |
| CHEMBL1898    | Serotonin 1b (5-HT1b) receptor                   | Homo sapiens          | inactive | inactive | inactive | 7   |
| CHEMBL4062    | Calpain 1                                        | Sus scrofa            | inactive | inactive | inactive | 6   |
| CHEMBL1867    | Alpha-2a adrenergic receptor                     | Homo sapiens          | inactive | inactive | inactive | 7   |
| CHEMBL299     | Protein kinase C alpha                           | Homo sapiens          | inactive | inactive | inactive | 7.5 |
| CHEMBL1921666 | DNA gyrase subunit B                             | Staphylococcus aureus | inactive | inactive | inactive | 6   |
| CHEMBL5973    | Carbonic anhydrase 15                            | Mus musculus          | inactive | inactive | inactive | 6   |
| CHEMBL1075317 | WD repeat-containing protein 5                   | Homo sapiens          | inactive | inactive | inactive | 6   |

|                      |                                                 |                                       |              |                 |             |            |
|----------------------|-------------------------------------------------|---------------------------------------|--------------|-----------------|-------------|------------|
| CHEMBL4462           | NAD-dependent deacetylase<br>sirtuin 2          | Homo sapiens                          | inactive     | inactive        | inactive    | 6          |
| CHEMBL262            | Glycogen synthase kinase-3 beta                 | Homo sapiens                          | inactive     | inactive        | inactive    | 7.5        |
| CHEMBL4072           | Cathepsin B                                     | Homo sapiens                          | inactive     | inactive        | inactive    | 6          |
| CHEMBL302            | Adenosine A2a receptor                          | Rattus norvegicus                     | inactive     | inactive        | inactive    | 7          |
| CHEMBL3286           | Urokinase-type plasminogen<br>activator         | Homo sapiens                          | inactive     | inactive        | inactive    | 6          |
| CHEMBL5185           | Glutamate racemase                              | Helicobacter pylori J99               | inactive     | inactive        | inactive    | 6.5        |
| <b>CHEMBL1908385</b> | <b>Serine/threonine-protein<br/>kinase pknB</b> | <b>Mycobacterium<br/>tuberculosis</b> | <b>empty</b> | <b>inactive</b> | <b>both</b> | <b>6.5</b> |
| CHEMBL1889           | Vasopressin V1a receptor                        | Homo sapiens                          | inactive     | inactive        | inactive    | 7          |
| CHEMBL1916           | Alpha-2c adrenergic receptor                    | Homo sapiens                          | inactive     | inactive        | inactive    | 7          |
| CHEMBL288            | Phosphodiesterase 4D                            | Homo sapiens                          | inactive     | inactive        | inactive    | 6          |
| CHEMBL2789           | Estradiol 17-beta-<br>dehydrogenase 2           | Homo sapiens                          | inactive     | inactive        | inactive    | 6          |
| CHEMBL1914           | Butyrylcholinesterase                           | Homo sapiens                          | inactive     | inactive        | inactive    | 6          |
| CHEMBL2094135        | Gamma-secretase                                 | Homo sapiens                          | inactive     | inactive        | inactive    | 5          |
| CHEMBL1900           | Aldose reductase                                | Homo sapiens                          | inactive     | inactive        | inactive    | 6          |
| CHEMBL249            | Neurokinin 1 receptor                           | Homo sapiens                          | inactive     | inactive        | inactive    | 7          |
| CHEMBL3130           | PI3-kinase p110-delta subunit                   | Homo sapiens                          | inactive     | inactive        | inactive    | 6          |
| CHEMBL275            | Phosphodiesterase 4B                            | Homo sapiens                          | inactive     | inactive        | inactive    | 6          |
| CHEMBL261            | Carbonic anhydrase I                            | Homo sapiens                          | inactive     | inactive        | inactive    | 6          |
| CHEMBL1860           | Thyroid hormone receptor<br>alpha               | Homo sapiens                          | inactive     | inactive        | inactive    | 7          |
| CHEMBL2414           | C-C chemokine receptor type 4                   | Homo sapiens                          | inactive     | inactive        | inactive    | 7          |
| CHEMBL315            | Alpha-1b adrenergic receptor                    | Rattus norvegicus                     | inactive     | inactive        | inactive    | 7          |
| CHEMBL5192           | Botulinum neurotoxin type A                     | Clostridium botulinum                 | inactive     | inactive        | both        | 6          |

|               |                                                                |                       |          |          |          |     |
|---------------|----------------------------------------------------------------|-----------------------|----------|----------|----------|-----|
| CHEMBL5145    | Serine/threonine-protein kinase<br>B-raf                       | Homo sapiens          | inactive | inactive | inactive | 7.5 |
| CHEMBL2617    | Tryptase beta-1                                                | Homo sapiens          | inactive | inactive | inactive | 6   |
| CHEMBL3247    | HMG-CoA reductase                                              | Rattus norvegicus     | inactive | inactive | inactive | 6   |
| CHEMBL3535    | Phosphodiesterase 9A                                           | Homo sapiens          | inactive | inactive | inactive | 6   |
| CHEMBL2830    | Voltage-gated L-type calcium<br>channel alpha-1C subunit       | Oryctolagus cuniculus | inactive | inactive | both     | 5   |
| CHEMBL2096680 | Glutamate NMDA receptor;<br>Grin1/Grin2a                       | Rattus norvegicus     | inactive | inactive | inactive | 5   |
| CHEMBL3910    | 11-beta-hydroxysteroid<br>dehydrogenase 1                      | Mus musculus          | inactive | inactive | inactive | 6   |
| CHEMBL4662    | Proteasome Macropain subunit<br>MB1                            | Homo sapiens          | inactive | inactive | inactive | 6   |
| CHEMBL260     | MAP kinase p38 alpha                                           | Homo sapiens          | inactive | inactive | inactive | 7.5 |
| CHEMBL274     | C-C chemokine receptor type 5                                  | Homo sapiens          | inactive | inactive | inactive | 7   |
| CHEMBL248     | Leukocyte elastase                                             | Homo sapiens          | inactive | inactive | inactive | 6   |
| CHEMBL1901    | Cholecystokinin A receptor                                     | Homo sapiens          | inactive | inactive | inactive | 7   |
| CHEMBL1929    | Xanthine dehydrogenase                                         | Homo sapiens          | empty    | inactive | inactive | 6   |
| CHEMBL2094108 | Protein farnesyltransferase                                    | Homo sapiens          | inactive | inactive | inactive | 6   |
| CHEMBL1907603 | Glutamate NMDA receptor;<br>GRIN1/GRIN2B                       | Homo sapiens          | inactive | inactive | inactive | 5   |
| CHEMBL2111367 | PI3-kinase p110-alpha/p85-<br>alpha                            | Homo sapiens          | inactive | inactive | inactive | 6   |
| CHEMBL4361    | Induced myeloid leukemia cell<br>differentiation protein Mcl-1 | Homo sapiens          | inactive | inactive | inactive | 6   |
| CHEMBL3368    | Glucocorticoid receptor                                        | Rattus norvegicus     | inactive | inactive | both     | 7   |
| CHEMBL3712907 | Transmembrane domain-<br>containing protein TMIGD3             | Homo sapiens          | inactive | inactive | inactive | 6   |

|               |                                                              |                                      |          |          |          |     |
|---------------|--------------------------------------------------------------|--------------------------------------|----------|----------|----------|-----|
| CHEMBL4822    | Beta-secretase 1                                             | Homo sapiens                         | inactive | inactive | inactive | 6   |
| CHEMBL5282    | Cytochrome P450 2A6                                          | Homo sapiens                         | inactive | inactive | inactive | 6   |
| CHEMBL213     | Beta-1 adrenergic receptor                                   | Homo sapiens                         | inactive | inactive | inactive | 7   |
| CHEMBL3142    | DNA-dependent protein kinase                                 | Homo sapiens                         | inactive | inactive | inactive | 7.5 |
| CHEMBL3616354 | Branched-chain-amino-acid<br>aminotransferase, mitochondrial | Homo sapiens                         | inactive | inactive | both     | 6   |
| CHEMBL1744525 | Nicotinamide<br>phosphoribosyltransferase                    | Homo sapiens                         | inactive | inactive | inactive | 6   |
| CHEMBL5645    | Cysteinyl leukotriene receptor 1                             | Cavia porcellus                      | inactive | inactive | inactive | 7   |
| CHEMBL5137    | Metabotropic glutamate<br>receptor 2                         | Homo sapiens                         | empty    | inactive | both     | 7   |
| CHEMBL5888    | Mitogen-activated protein<br>kinase kinase kinase 14         | Homo sapiens                         | inactive | inactive | inactive | 7.5 |
| CHEMBL3023    | Sphingosine kinase 2                                         | Homo sapiens                         | inactive | inactive | inactive | 6   |
| CHEMBL2329    | Dihydrofolate reductase                                      | Candida albicans                     | empty    | inactive | inactive | 6.5 |
| CHEMBL3108640 | Bromodomain-containing<br>protein 9                          | Homo sapiens                         | inactive | inactive | inactive | 6   |
| CHEMBL3157    | Bradykinin B2 receptor                                       | Homo sapiens                         | inactive | inactive | inactive | 7   |
| CHEMBL1250375 | NADPH oxidase 4                                              | Homo sapiens                         | inactive | inactive | inactive | 6   |
| CHEMBL206     | Estrogen receptor alpha                                      | Homo sapiens                         | inactive | inactive | inactive | 7   |
| CHEMBL3816    | Cytosolic phospholipase A2                                   | Homo sapiens                         | inactive | inactive | inactive | 6   |
| CHEMBL4296301 | Reverse transcriptase protein                                | Human<br>immunodeficiency<br>virus 1 | inactive | inactive | inactive | 6   |
| CHEMBL2189117 | Polycomb protein EED                                         | Homo sapiens                         | inactive | inactive | inactive | 6   |
| CHEMBL1781    | DNA topoisomerase I                                          | Homo sapiens                         | inactive | inactive | inactive | 6   |
| CHEMBL210     | Beta-2 adrenergic receptor                                   | Homo sapiens                         | inactive | inactive | inactive | 7   |
| CHEMBL238     | Dopamine transporter                                         | Homo sapiens                         | inactive | inactive | inactive | 6   |

|               |                                           |                       |          |          |          |     |
|---------------|-------------------------------------------|-----------------------|----------|----------|----------|-----|
| CHEMBL2424504 | Lysine-specific demethylase 5A            | Homo sapiens          | inactive | inactive | inactive | 6   |
| CHEMBL5493    | Free fatty acid receptor 2                | Homo sapiens          | inactive | inactive | inactive | 6.5 |
| CHEMBL402     | HMG-CoA reductase                         | Homo sapiens          | inactive | inactive | inactive | 6   |
| CHEMBL3753    | Glutamate receptor ionotropic,<br>AMPA 1  | Rattus norvegicus     | inactive | inactive | inactive | 5   |
| CHEMBL2882    | Histamine H2 receptor                     | Cavia porcellus       | inactive | inactive | inactive | 7   |
| CHEMBL1255150 | G-protein coupled bile acid<br>receptor 1 | Mus musculus          | inactive | inactive | inactive | 7   |
| CHEMBL1163116 | Cholesteryl ester transfer<br>protein     | Oryctolagus cuniculus | inactive | inactive | inactive | 5   |
| CHEMBL4029    | Interleukin-8 receptor A                  | Homo sapiens          | inactive | inactive | inactive | 6.5 |
| CHEMBL4015    | C-C chemokine receptor type 2             | Homo sapiens          | inactive | inactive | inactive | 7   |
| CHEMBL1804    | Somatostatin receptor 2                   | Homo sapiens          | inactive | inactive | inactive | 7   |
| CHEMBL3975    | Fructose-1,6-bisphosphatase               | Homo sapiens          | inactive | inactive | inactive | 6   |
| CHEMBL211     | Muscarinic acetylcholine<br>receptor M2   | Homo sapiens          | inactive | inactive | inactive | 7   |
| CHEMBL3137262 | LSD1/CoREST complex                       | Homo sapiens          | empty    | inactive | inactive | 6   |
| CHEMBL205     | Carbonic anhydrase II                     | Homo sapiens          | empty    | inactive | inactive | 6   |
| CHEMBL3815    | Squalene synthetase                       | Rattus norvegicus     | empty    | inactive | inactive | 6   |
| CHEMBL4439    | TGF-beta receptor type I                  | Homo sapiens          | inactive | inactive | inactive | 7.5 |
| CHEMBL3356    | Cytochrome P450 1A2                       | Homo sapiens          | inactive | inactive | inactive | 6   |
| CHEMBL1907601 | Cyclin-dependent kinase<br>4/cyclin D1    | Homo sapiens          | inactive | inactive | inactive | 7.5 |
| CHEMBL3385    | MAP kinase ERK1                           | Homo sapiens          | inactive | inactive | inactive | 6.5 |
| CHEMBL1907605 | Cyclin-dependent kinase<br>2/cyclin E1    | Homo sapiens          | inactive | inactive | inactive | 7.5 |
| CHEMBL3959    | Quinone reductase 2                       | Homo sapiens          | inactive | inactive | inactive | 6   |



|               |                                                 |                          |          |          |          |     |
|---------------|-------------------------------------------------|--------------------------|----------|----------|----------|-----|
| CHEMBL3024    | Serine/threonine-protein kinase<br>PLK1         | Homo sapiens             | inactive | inactive | inactive | 7.5 |
| CHEMBL5441    | Dihydrofolate reductase                         | Escherichia coli         | inactive | inactive | inactive | 6   |
| CHEMBL4777    | Neuropeptide Y receptor type 1                  | Homo sapiens             | inactive | inactive | inactive | 7   |
| CHEMBL1829    | Histone deacetylase 3                           | Homo sapiens             | inactive | inactive | inactive | 6   |
| CHEMBL3623    | Quinone reductase 1)                            | Homo sapiens             | inactive | inactive | inactive | 6   |
| CHEMBL228     | Serotonin transporter                           | Homo sapiens             | inactive | inactive | inactive | 6   |
| CHEMBL1949    | Cyclophilin A                                   | Homo sapiens             | empty    | inactive | both     | 6   |
| CHEMBL4414    | Plasmepsin 2                                    | Plasmodium<br>falciparum | inactive | inactive | inactive | 6   |
| CHEMBL4372    | Anthrax lethal factor                           | Bacillus anthracis       | inactive | inactive | inactive | 6   |
| CHEMBL1907604 | Glutamate NMDA receptor;<br>GRIN1/GRIN2A        | Homo sapiens             | inactive | inactive | inactive | 6.5 |
| CHEMBL3437    | Amine oxidase, copper<br>containing             | Homo sapiens             | inactive | inactive | inactive | 6   |
| CHEMBL4358    | Arachidonate 15-lipoxygenase                    | Oryctolagus cuniculus    | inactive | inactive | inactive | 6   |
| CHEMBL2111389 | CDK9/cyclin T1                                  | Homo sapiens             | inactive | inactive | inactive | 7.5 |
| CHEMBL1977    | Vitamin D receptor                              | Homo sapiens             | empty    | inactive | inactive | 7   |
| CHEMBL3594    | Carbonic anhydrase IX                           | Homo sapiens             | inactive | inactive | inactive | 6   |
| CHEMBL5443    | Cell division cycle 7-related<br>protein kinase | Homo sapiens             | inactive | inactive | both     | 7.5 |
| CHEMBL2489    | Prostanoid EP4 receptor                         | Mus musculus             | empty    | inactive | inactive | 7   |
| CHEMBL3797    | Serine-protein kinase ATM                       | Homo sapiens             | inactive | inactive | inactive | 6.5 |
| CHEMBL203     | Epidermal growth factor<br>receptor erbB1       | Homo sapiens             | inactive | inactive | inactive | 7.5 |
| CHEMBL217     | Dopamine D2 receptor                            | Homo sapiens             | inactive | inactive | inactive | 7   |
| CHEMBL3807    | T-cell protein-tyrosine<br>phosphatase          | Homo sapiens             | empty    | inactive | both     | 6   |

|            |                                  |              |          |          |          |   |
|------------|----------------------------------|--------------|----------|----------|----------|---|
| CHEMBL4198 | Inhibitor of apoptosis protein 3 | Homo sapiens | inactive | inactive | inactive | 6 |
| CHEMBL1792 | Somatostatin receptor 5          | Homo sapiens | inactive | inactive | inactive | 7 |

The entry corresponding to *Mycobacterium tuberculosis* is highlighted in bold

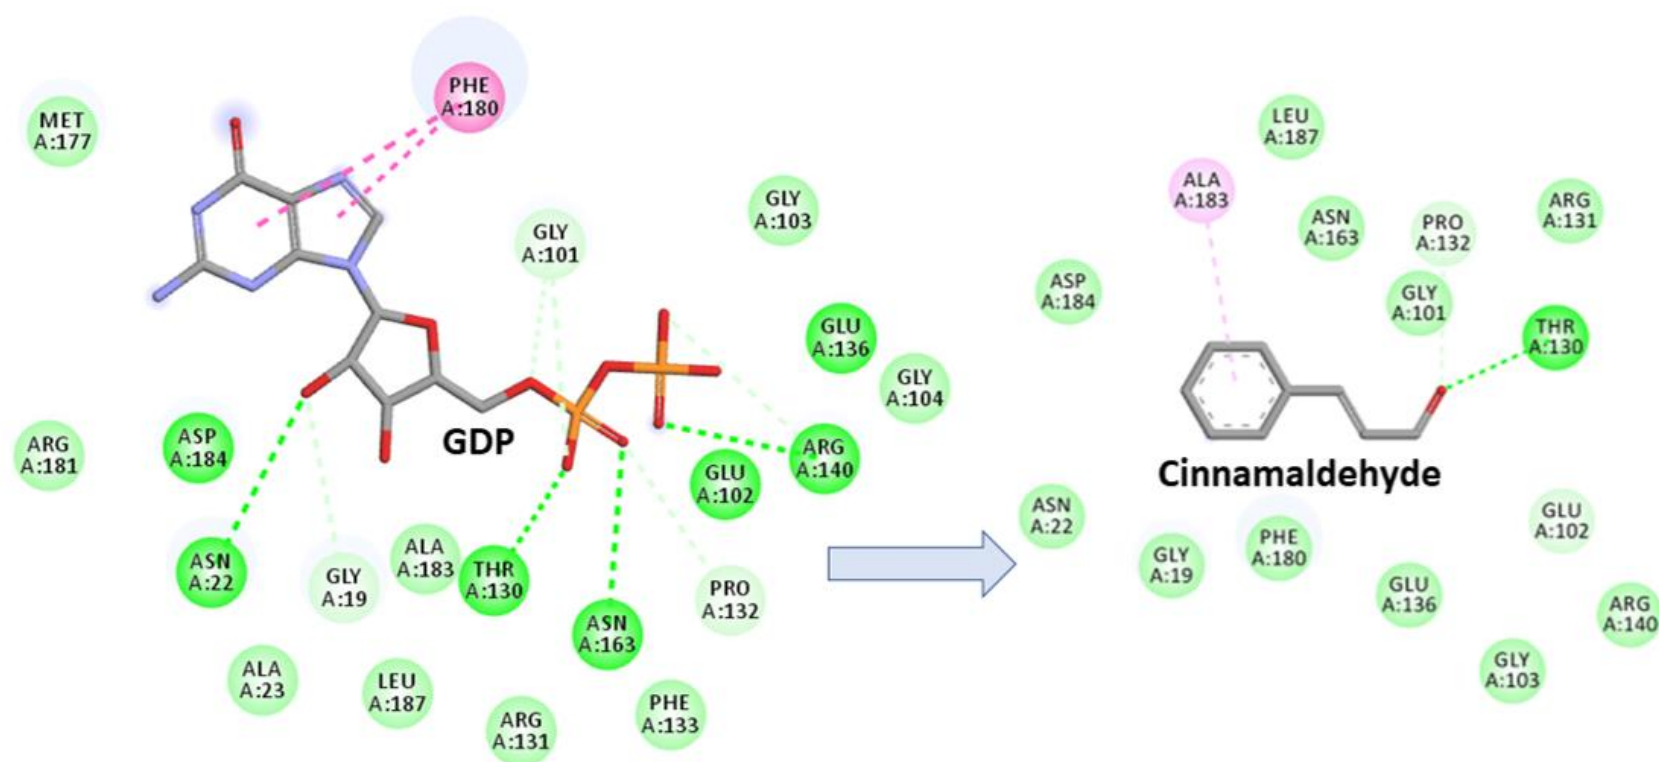

**Figure S1.** This is a figure of the binding modes for the best poses of the docked FtsZ complexes with GDP nucleotide moiety and cinnamaldehyde in the active site.

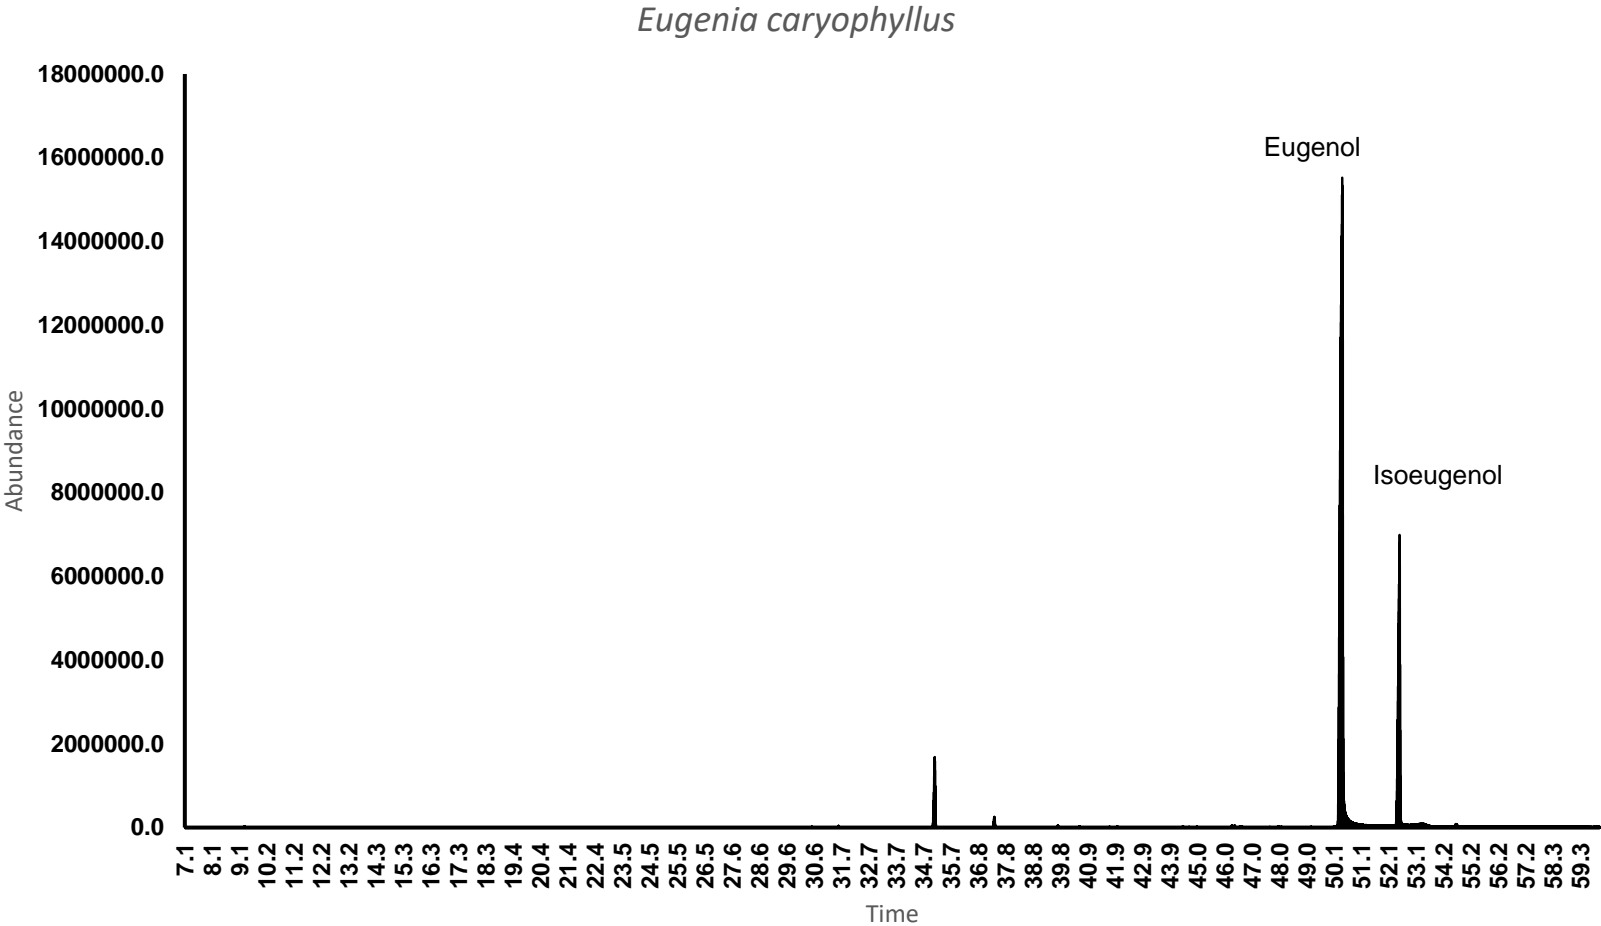

**Figure S2.** This is the gas chromatogram of *Eugenia caryophyllus* essential oil showing eugenol as the dominant compound.

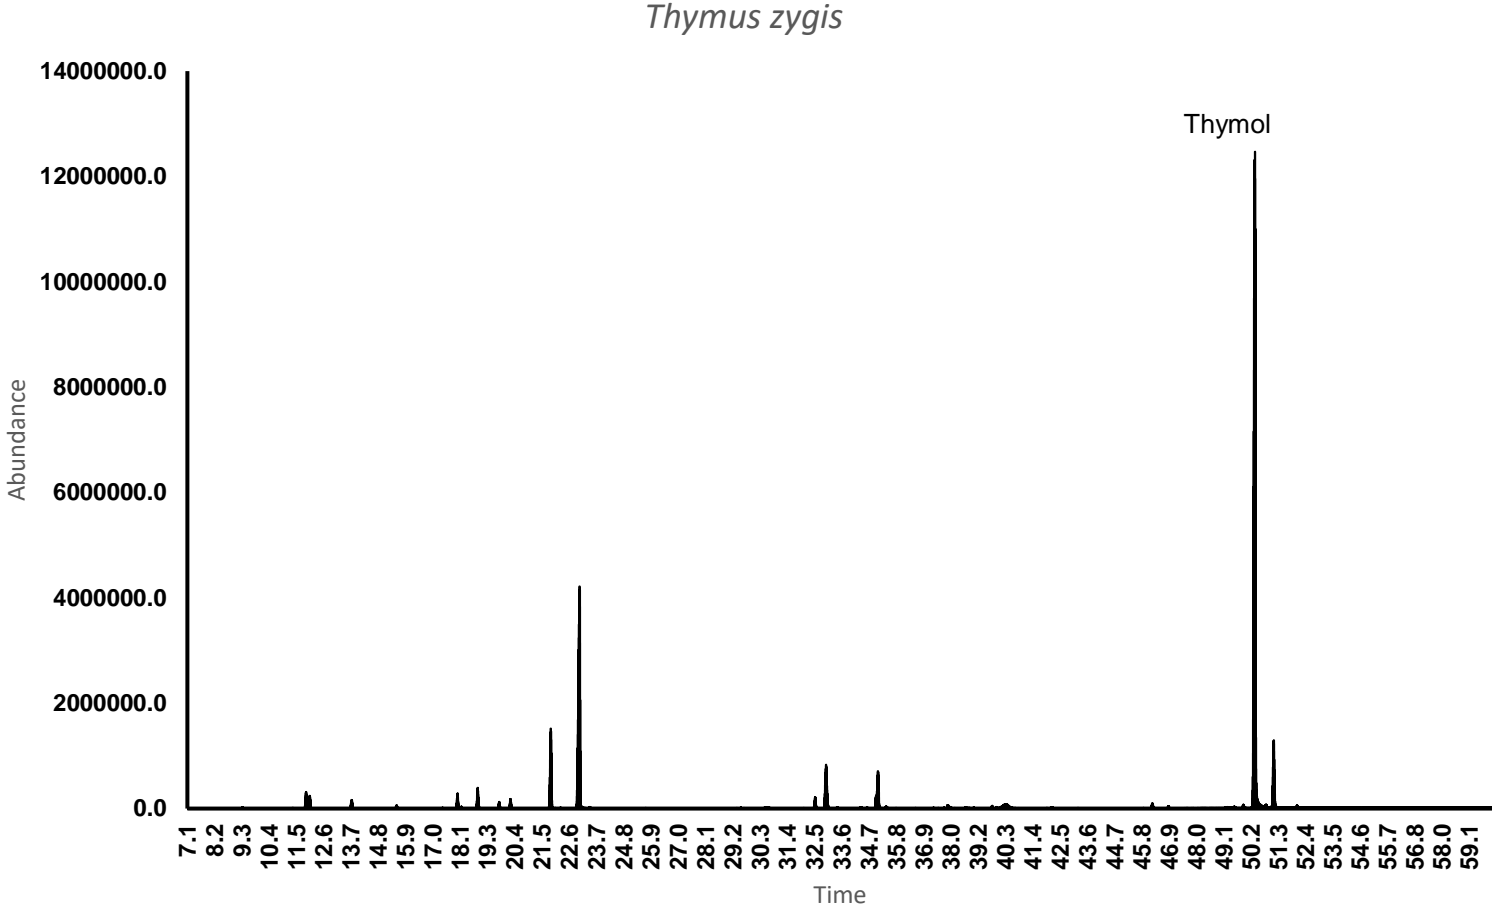

**Figure S3.** This is the gas chromatogram of *Thymus zygis* showing thymol as a major compound

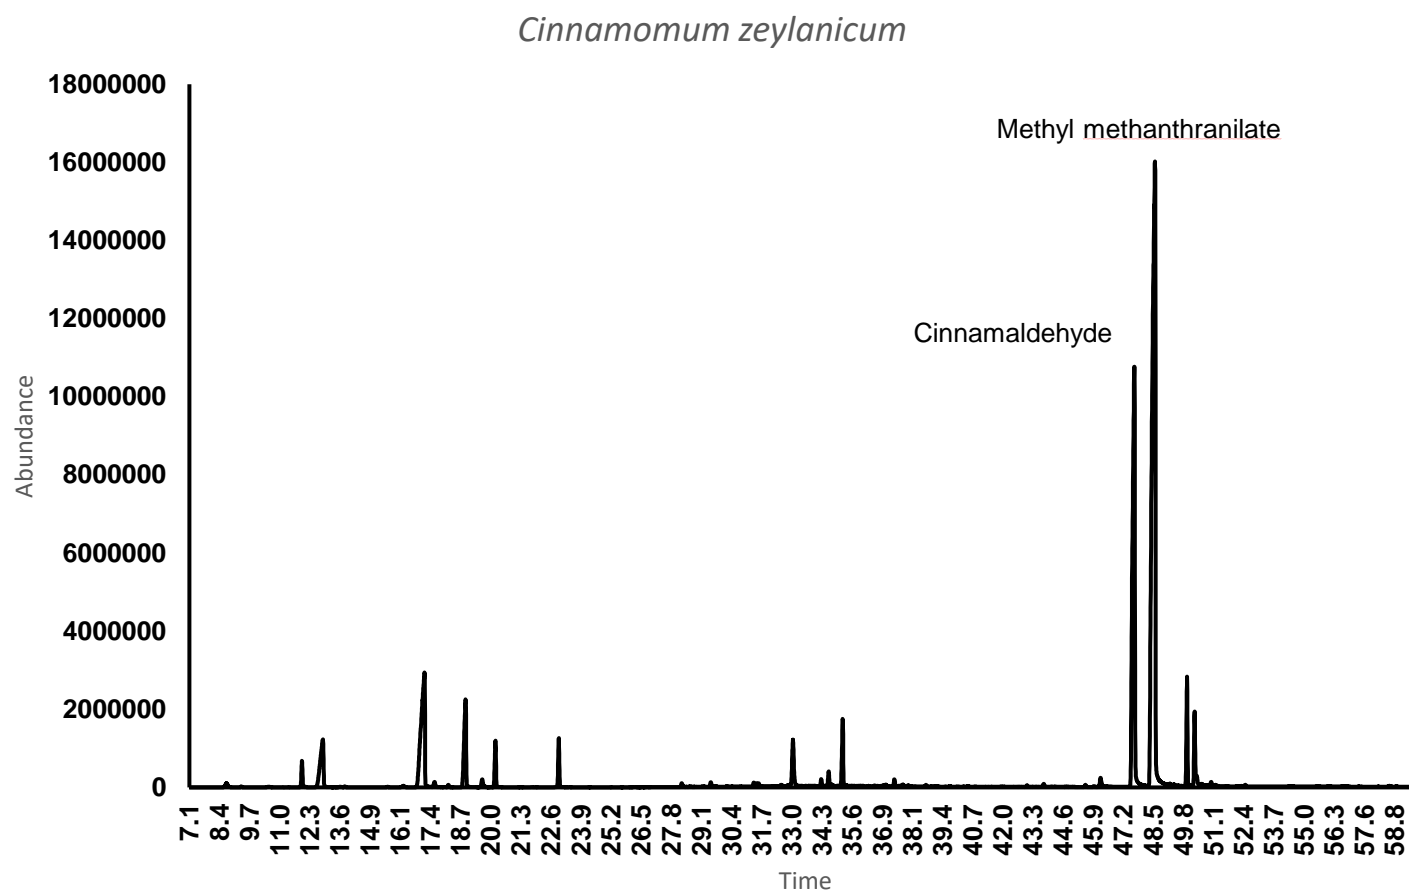

**Figure S4.** This is the gas chromatograms of essential oils of *Cinnamomum zeylanicum* (bark) showing cinnamaldehyde as the major compounds
